# Supplementary material for: A protic ionic liquid, when entrapped in cationic reverse micelles, can be used as a suitable solvent for a bimolecular nucleophilic substitution reaction
Source: Royal Society of Chemistry journal article supplement (doi:10.1039/c5ob02664d), 2016-01-01
Supplement: c5ob02664d1.pdf [file c5ob02664d1.pdf]

## **Supplementary Information**

### **Protic Ionic Liquid when Entrapped in Cationic Reverse Micelles Can Be Used as Suitable Solvent for a Bimolecular Nucleophilic Substitution Reaction**

Matías A. Crosio, N. Mariano Correa, Juana J. Silber, R. Darío Falcone\*

Departamento de Química. Universidad Nacional de Río Cuarto. Agencia Postal # 3.  
C.P. X5804BYA Río Cuarto. Argentina.

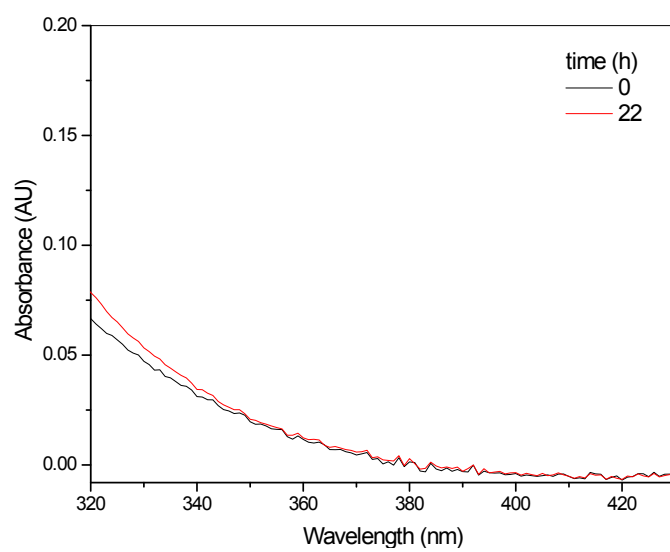

**Figure S1.** Absorption spectra of the reaction of  $\text{Cl}^-$  (0.2 M) with  $\text{S}^+$  in neat EAN at 30 °C.  $[\text{S}^+] = 5 \times 10^{-5}$  M.  $T = 30$  °C.

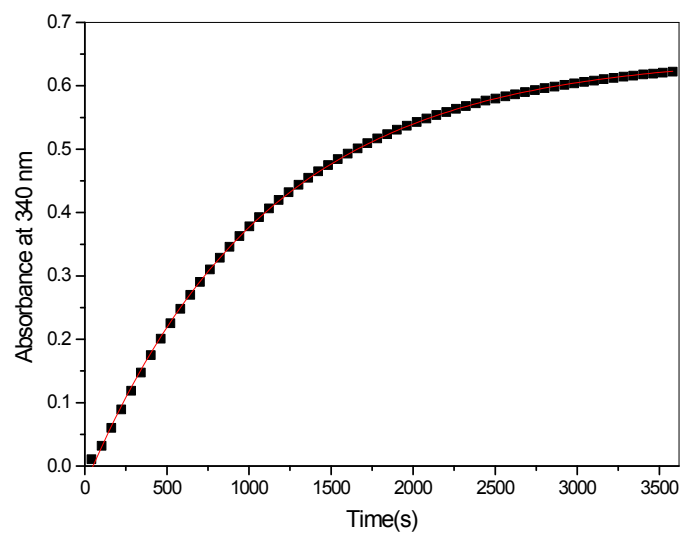

**Figure S2.** Absorbance at 340 nm as a function of time in the reaction shown in Figure 2. (■) experimental data and (—) first order reaction fit.  $W_s = 0.05$ .  $[\text{Cl}^-] = 0.1 \text{ M}$ .  $[\text{S}^+] = 5 \times 10^{-5} \text{ M}$ .  $T = 30 \text{ }^\circ\text{C}$ . The spectra were recorded at 60 second intervals.

**Table S1.**  $k_{obs}$  values obtained in toluene/BHDC/EAN RMs, varying the total concentration of BHDC ( $[BHDC]_{tot}$ ) at different  $W_s$ . T = 30 °C.

| $W_s$ | $[BHDC]_{tot} / M$ | $k_{obs} / s^{-1}$   |
|-------|--------------------|----------------------|
| 0.02  | 0.01               | $8.4 \times 10^{-5}$ |
|       | 0.07               | $7.4 \times 10^{-4}$ |
|       | 0.09               | $8.4 \times 10^{-4}$ |
|       | 0.10               | $8.7 \times 10^{-4}$ |
|       | 0.15               | $9.5 \times 10^{-4}$ |
|       | 0.20               | $9.9 \times 10^{-4}$ |
| 0.05  | 0.03               | $7.0 \times 10^{-4}$ |
|       | 0.06               | $7.5 \times 10^{-4}$ |
|       | 0.08               | $8.2 \times 10^{-4}$ |
|       | 0.10               | $8.5 \times 10^{-4}$ |
|       | 0.15               | $9.1 \times 10^{-4}$ |
|       | 0.19               | $9.4 \times 10^{-4}$ |
| 0.11  | 0.03               | $5.9 \times 10^{-4}$ |
|       | 0.06               | $7.3 \times 10^{-4}$ |
|       | 0.10               | $8.0 \times 10^{-4}$ |
|       | 0.15               | $9.0 \times 10^{-4}$ |
|       | 0.19               | $9.4 \times 10^{-4}$ |
| 0.17  | 0.03               | $1.8 \times 10^{-4}$ |
|       | 0.07               | $2.6 \times 10^{-4}$ |
|       | 0.09               | $2.9 \times 10^{-4}$ |
|       | 0.10               | $3.2 \times 10^{-4}$ |
|       | 0.15               | $3.7 \times 10^{-4}$ |
|       | 0.20               | $4.0 \times 10^{-4}$ |

## Derivation of the rate equation

The reaction of the sulfonium  $S^+$  with chloride ion presented in Scheme 2 is a bimolecular reaction, which follows the rate law described by equation S1:

$$rate = \frac{d[P]}{dt} = k_2[Cl^-][S^+] \quad (S1)$$

If  $[Cl^-] \gg [S^+]$ , a pseudo first order behavior for the kinetics of the reaction is assumed in order to quantify the reaction rate. Thus, the expression for the observable rate constant ( $k_{obs}$ ) can be defined as equation S2:

$$k_{obs} = k_2[Cl^-] \quad (S2)$$

where  $k_2$  is the second order rate constant and  $[Cl^-]$  is the total nucleophile concentration.

As in the present work we used  $[BHDC] >$  critical micellar concentration (cmc) value (0.01 M)<sup>1</sup>,  $S^+$  is incorporated into the RMs (as is expressed by equation S3) favored by its low solubility in the aromatic solvent.

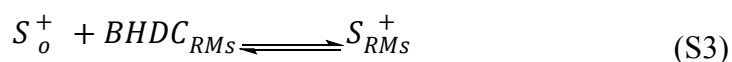

where  $S_o^+$  and  $S_{RMs}^+$  symbolize the substrate in the toluene and in the RMs pseudophases, respectively.  $BHDC_{RMs}$  represents the cationic RMs. As it is conventional for micellar aggregates, the concentration of micellized<sup>2</sup> surfactant defined

as  $[BHDC]_{RMs}$  (where  $[BHDC]_{RMs}$  can be approximated to  $[BHDC]_{tot} - cmc$ ) can be calculated, and if the mass balance for  $S^+$  ( $[S^+]_{tot} = [S^+]_o + [S^+]_{RMs}$ ) is considered, the partition constant of the substrate ( $K_p$ ) is defined as equation S4:

$$K_p = \frac{[S^+]_{RMs}}{[S^+]_o[BHDC]_{RMs}} \quad (S4)$$

The overall reaction rate can be expressed as the sum of the rate in the organic pseudophase and in the RMs, as equation S5:

$$rate = k'_o[S^+]_o + k'_{RMs}[S^+]_{RMs} \quad (S5)$$

where  $[S^+]_o$  and  $[S^+]_{RMs}$  are the concentration of  $S^+$  in organic pseudophase and in the RMs, both referred to the total volume.  $k'_o$  and  $k'_{RMs}$  are the pseudo-first order rate constant values in the organic pseudophase and in BHDC RMs, respectively. Both rate constants are defined as equations S6 and S7, respectively.

$$k'_o = k_2^o[Cl^-]_o \quad (S6)$$

$$k'_{RMs} = k_2^{RMs}[Cl^-]_{RMs} \quad (S7)$$

Where  $k_2^o$  and  $k_2^{RMs}$  are the second order rate constants in the organic and RMs pseudophases.  $[Cl^-]_{RMs}$  is the  $Cl^-$  concentration in the RMs referring to the volume of

the RMs ( $V_m$ ). This concentration can be expressed also as the multiplication of the fraction of neutralized charge,  $\beta$ , and  $[BHDC]^{3,4}$  (equation S8).

$$k'_{RMs} = k_2^{RMs} \beta [BHDC]_{RMs}^m \quad (S8)$$

Additionally, the surfactant concentrations referred to the micellar phase volume ( $[BHDC]_{RMs}^m$ ) can be expressed in concentrations referred to the total volume, ( $[BHDC]_{RMs}$ ), taking into consideration the volume fraction occupied by the micellar phase,  $V_{tot}/V_m$  as equation S9 shows.

$$k'_{RMs} = k_2^{RMs} \beta \frac{V_{tot}}{V_m} [BHDC]_{RMs} \quad (S9)$$

The concentrations can be transformed into concentrations referred to the total volume of the system by taking into account just the phase volumes<sup>5</sup> (equation S10).

$$\frac{V_{tot}}{V_m} = \frac{1}{\bar{V}_{BHDC} [BHDC]_{RMs}} \quad (S10)$$

where  $\bar{V}_{BHDC}$  is the molar volume of BHDC. Thus, equation S7 can be rewritten as:

$$k'_{RMs} = k_2^{RMs} \beta \frac{1}{\bar{V}_{BHDC}} \quad (S11)$$

When the BHDC RMs are formed, the rate constant in the organic pseudophase (toluene + BHDC surfactant monomers),  $k'_o$  in equation S5, can be assumed as the observed rate constant value in the cmc ( $k_{obs}^{cmc}$ ). It must be recalled that above the cmc, the monomeric [BHDC] remains constant and the rate constant for the reaction in the organic solvent should be constant.

Taking into account the equations S3-11, the concentration of the substrate in the RMs can be expressed as equation S12:

$$[S^+]_{RMs} = \frac{K_p[BHDC]_{RMs}}{1 + K_p[BHDC]_{RMs}} [S^+]_{tot} \quad (S12)$$

Thus, in the toluene/BHDC/EAN RMs the observed rate constant  $k_{obs}$  can be depicted as equation S13 (equation 5 in the main text):

$$k_{obs} = k_{obs}^{cmc} + \frac{k_2^{RMs} \beta K_p[BHDC]_{RMs}}{V_{BHDC} (1 + K_p[BHDC]_{RMs})} \quad (S13)$$



## References

- 1- A. Jada, J. Lang, R. Zana, *J. Phys. Chem.* 1990, **94**, 381-387.
- 2- C. A. Bunton, F. Nome, F. H. Quina, L. S. Romsted, *Acc. Chem. Res.* 1991, **24**, 357-364.
- 3- D. Blach, M Pessêgo, J. J. Silber, N. M. Correa, L. García-Río, R. D. Falcone, *Langmuir*, 2014, **30**, 12130-12137.
- 4- E. Fernandez, L. Garcia-Rio, P. Rodriguez-Dafonte, *J. Colloid Int. Sci.* 2007, **316**, 1023-1026.
- 5- M. Andujar-Matalobos, L. Garcia-Rio, S. Lopez-Garcia, P. Rodriguez-Dafonte, *J. Colloid Int. Sci.* 2011, **363**, 261-267.
